# Supplementary material for: Solution process for fabricating CuIn0.9R0.1(S,Se)2 (R = Al, Ni, Co)/CdS p–n junctions and their applications in solar cells
Source: Royal Society of Chemistry journal article supplement (doi:10.1039/c5nj02754c), 2015-12-16
Supplement: c5nj02754c1.pdf [file c5nj02754c1.pdf]

Electronic Supplementary Material (ESI) for New Journal of Chemistry.  
This journal is © The Royal Society of Chemistry 2015

## **Solution Process to Fabricate $\text{CuIn}_{0.9}(\text{Al, Ni, Co})_{0.1}(\text{S,Se})_2$ Thin Film and Their Application in Solar Cells**

Yong Cui,<sup>\*a,c</sup> Zhe Zhang,<sup>c</sup> Xu Du,<sup>c</sup> Wei Liu,<sup>c</sup> Yulin Deng,<sup>c</sup> Shi Liu,<sup>a</sup> Gang Wang<sup>\*b</sup>

a Institute of Metal Research, Chinese Academy of Sciences, Key Laboratory of Nuclear Materials and Safety Assessment, Division of Materials for Special Environments, Shenyang, Liaoning Province, 110016, China

b Changchun Institute of Applied Chemistry, Chinese Academy of Sciences, State Key Laboratory of Rare Earth Utilization, Changchun, Jilin Province, 130022, China

c Renewable Bioproducts Institute, Georgia Institute of Technology, Atlanta, Georgia, 30318, the United States

### **\* Corresponding author, Address:**

1 Yong Cui, Institute of Metal Research, Chinese Academy of Sciences, 72 Wenhua road, Shenhe District, Shenyang City 110016, Liaoning Province, China

E-mail address: [yongcui@imr.ac.cn](mailto:yongcui@imr.ac.cn)

2 Gang Wang, Institute of Changchun Applied Chemistry, Chinese Academy of Sciences, 5625 Renmin Street, Changchun 130022, Jilin Province, China.

E-mail address: [wsu@ciac.ac.cn](mailto:wsu@ciac.ac.cn)

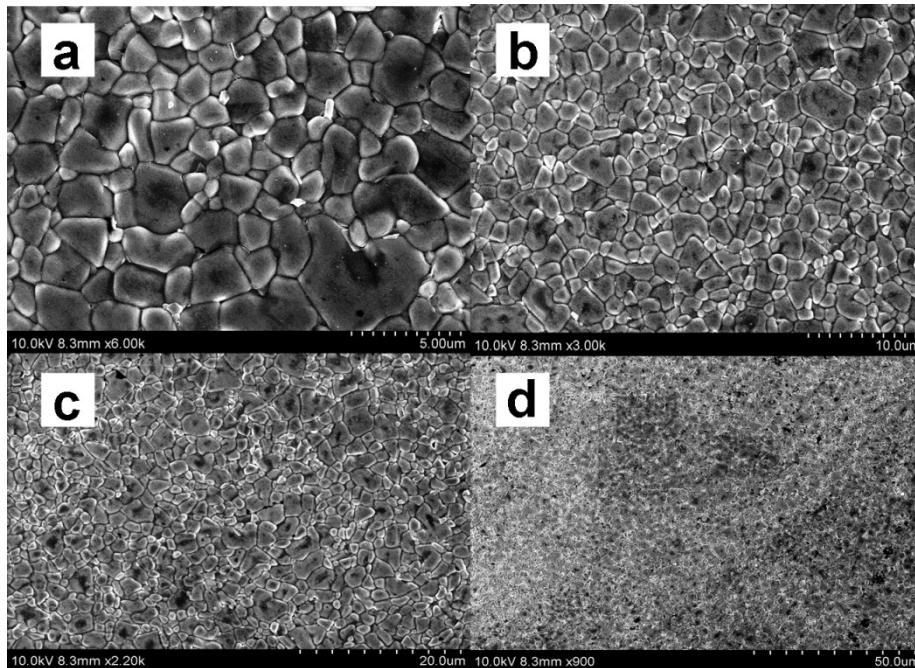

**Fig. S1** Top-view SEM images of  $\text{CuIn}_{0.9}\text{Al}_{0.1}(\text{S,Se})_2$  thin film at different scale bar. (a)  $5\mu\text{m}$ , (b)  $10\mu\text{m}$ , (c)  $20\mu\text{m}$ , (d)  $50\mu\text{m}$ .

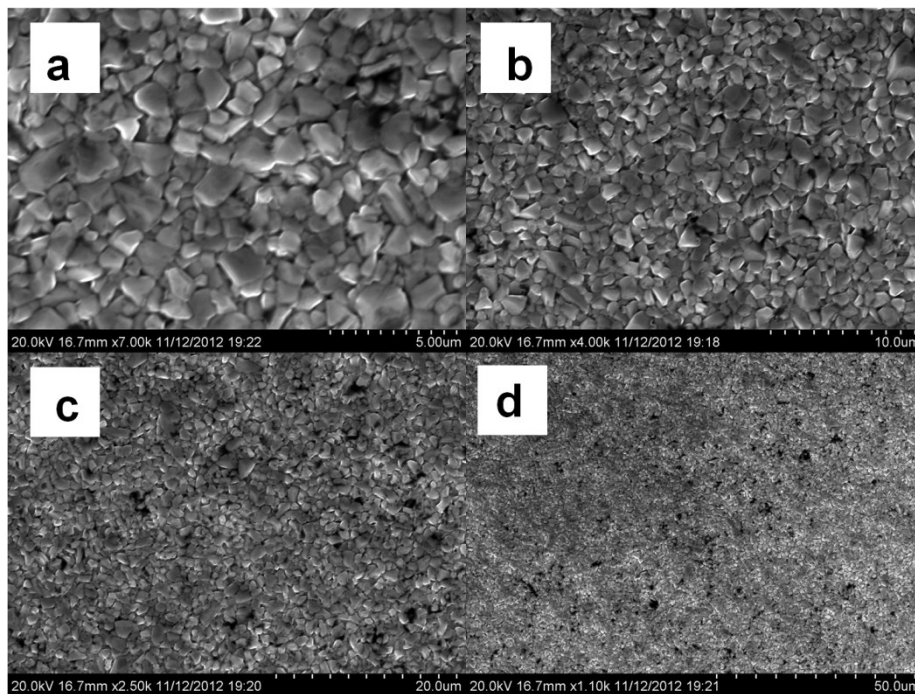

**Fig. S2** Top-view SEM images of  $\text{CuIn}_{0.9}\text{Ni}_{0.1}(\text{S,Se})_2$  thin film at different scale bar. (e)  $5\mu\text{m}$ , (f)  $10\mu\text{m}$ , (g)  $20\mu\text{m}$ , (h)  $50\mu\text{m}$ .

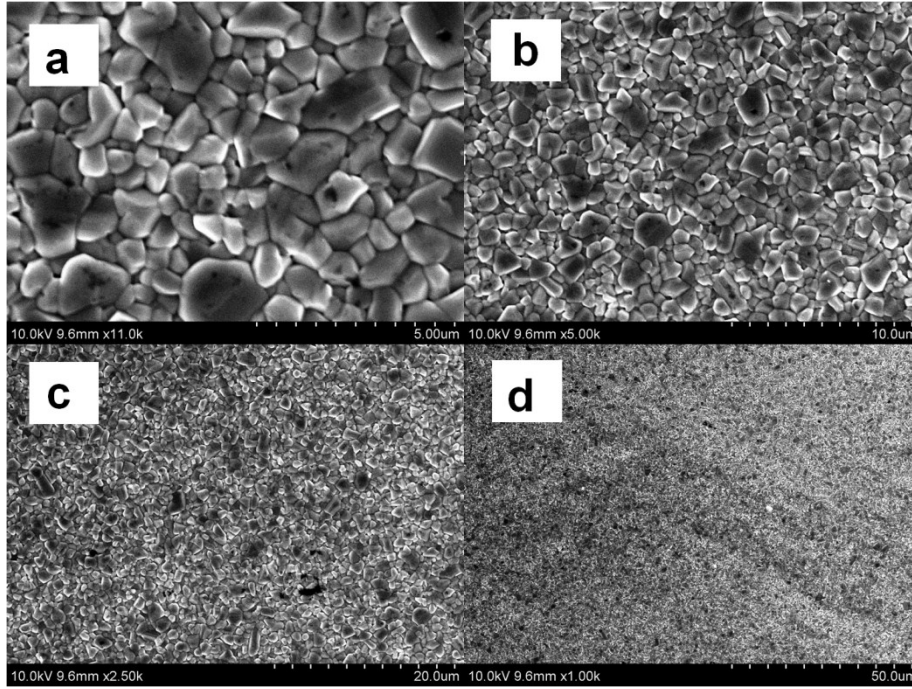

**Fig. S3** Top-view SEM images of  $\text{CuIn}_{0.9}\text{Co}_{0.1}(\text{S,Se})_2$  thin film at different scale bar. (i)  $5\mu\text{m}$ , (j)  $10\mu\text{m}$ , (k)  $20\mu\text{m}$ , (l)  $50\mu\text{m}$ .

**Tab. S1:** Series resistance and shunt resistance for the CIASSe, CINSSe and CICSSe thin film solar cells.

| Material | Series resistance<br>( $\Omega/\text{cm}^2$ ) | Shunt resistance<br>( $\Omega/\text{cm}^2$ ) |
|----------|-----------------------------------------------|----------------------------------------------|
| CIASSe   | 33.22                                         | 100.54                                       |
| CINSSe   | 167.66                                        | 53.27                                        |
| CICSSe   | 41.57                                         | 38.41                                        |

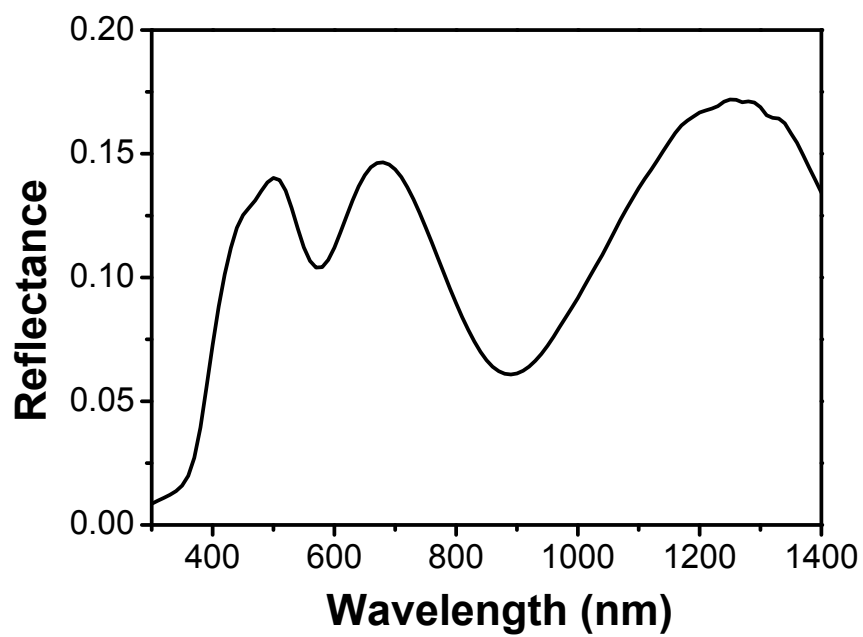

**Fig. S4** The reflectance spectra of the CIASSe solar cell.
